# Supplementary material for: Structural and photophysical studies on gallium(iii) 8-hydroxyquinoline-5-sulfonates. Does excited state decay involve ligand photolabilisation?
Source: Royal Society of Chemistry journal article supplement (doi:10.1039/c2dt32587j), 2012-12-10
Supplement: c2dt32587j.pdf [file c2dt32587j.pdf]

## STRUCTURAL AND PHOTOPHYSICAL STUDIES ON GALLIUM (III) 8-HYDROXYQUINOLINE-5-SULFONATES. DOES EXCITED STATE DECAY INVOLVE LIGAND PHOTOLABILISATION?

*M. Luísa Ramos, Andreia R. E. de Sousa, Licínia L. G. Justino, Sofia M. Fonseca,  
Carlos F. G. C. Geraldés and Hugh D. Burrows*

### Supporting Information

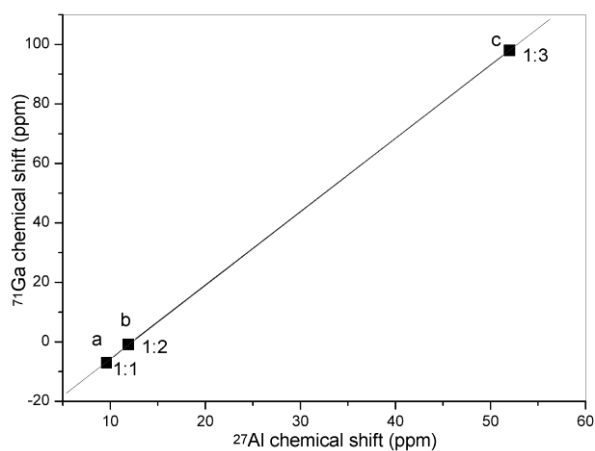

S1. Correlation of  $^{71}\text{Ga}$  with  $^{27}\text{Al}$  NMR shifts observed for homologous complexes of Ga(III) and Al(III) (metal:ligand) 1:1, 1:2 and 1:3 complexes.

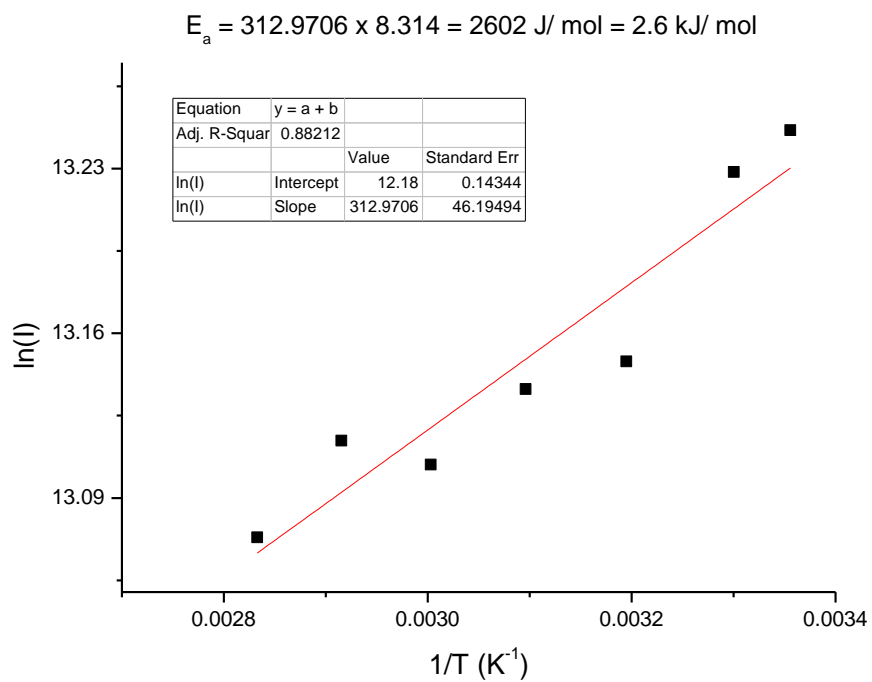

S2. Arrhenius type plot for fluorescence intensity of Ga(III)/ 8-HQS
